# Supplementary material
Source: Springer Nature journal article supplement (https://www.springermedizin.de/resource/supplementary/12913_2008_795_MOESM6_ESM.pdf/9535598)
Supplement: MOESM6 [file 9535598]

**Table 2: Randomization, data collection, analyses and results**

| Ref  | a) Randomization type<br>b) N, n-intervention, and n-control                                                                                                                                                                                | Outcomes                                                                                                                                                                                               |                                                                                                                                                                                                                                                                                                                                                    | a) Statistical methods<br>b) Randomization evaluated? (yes, no)<br>If yes: variables, potential differences and possible adjustment performed noted?<br>c) Numbers included in analyses<br>d) Intention-to-treat analyses (yes/no/not mentioned)                                                                                                                     | Main results                                                                                                                                                                                                                                                                                                                                                                                                                                                                                                                                                        |
|------|---------------------------------------------------------------------------------------------------------------------------------------------------------------------------------------------------------------------------------------------|--------------------------------------------------------------------------------------------------------------------------------------------------------------------------------------------------------|----------------------------------------------------------------------------------------------------------------------------------------------------------------------------------------------------------------------------------------------------------------------------------------------------------------------------------------------------|----------------------------------------------------------------------------------------------------------------------------------------------------------------------------------------------------------------------------------------------------------------------------------------------------------------------------------------------------------------------|---------------------------------------------------------------------------------------------------------------------------------------------------------------------------------------------------------------------------------------------------------------------------------------------------------------------------------------------------------------------------------------------------------------------------------------------------------------------------------------------------------------------------------------------------------------------|
|      |                                                                                                                                                                                                                                             | Outcomes of interest* (Time of measure)                                                                                                                                                                | Outcome source (Validity account#)                                                                                                                                                                                                                                                                                                                 |                                                                                                                                                                                                                                                                                                                                                                      |                                                                                                                                                                                                                                                                                                                                                                                                                                                                                                                                                                     |
| [19] | a) Stratified, cluster (stratification at surgeon level (experience of surgeon's breast cancer practice); Within each stratum randomization was performed in blocks of four.<br>b) N(Surgeons)=60; N(Patients)=335, n-CM=169, n-control=166 | Primary: cancer-specific therapies received (after 6 months)<br><br>Secondary: patient evaluations of the decision-making process; arm function on affected side. (2 (and 12) months after diagnosis.) | Primary: medical records audit (A summary measure of receipt of appropriate therapy was created based on published consensus recommendations; ref)<br><br>Secondary: home interview based on pilot tested questionnaires on logistics, decision-making, satisfaction and tamoxifen prescription (?) and objective assessment of arm functions (?). | a) Differences in baseline characteristics and in outcomes between control and intervention groups were assessed using chi-square. (Cluster effect at surgeon level was adjusted for.)<br>b) Yes. No difference found (demographics, cognitive function, and stage of disease)<br>c) Primary outcome: n-CM: 169 and n-control 166<br>Secondary outcomes: ?<br>d) Yes | Primary: More women in the intervention group saw a radiation oncologist at their initial evaluation (36.0 vs. 19.3%, P=0.006), received breast-conserving surgery (28.6 vs. 18.7%, p=0.031) and radiation therapy (36.0% vs. 19.0%; P=0.003).<br>Secondary:<br>Intervention group was significantly more satisfied (more components; p<0.05) and had significantly more normal or near-normal range of arm motion (93 vs. 84%, p=0.037). (Several subgroup analyses: "Women with poor social support were most likely to benefit from the nurse CM intervention.") |
| [23] | a) Simple, two-arm randomization.<br>b) N=210, n-int=106, n-control=104                                                                                                                                                                     | -Quality of Life (QoL) (At enrolment + 1, 3, 6, 12, 18, 24 months after enrolment.)<br><br>-Cost data (24 months after date of diagnosis).                                                             | -QoL measured with three self-administered questionnaires:<br>1. MUIS: uncertainty<br>2. POMS: mood<br>3. FACT-E: well-being/ QoL on six dimensions. (yes, all validated + ref)<br>-Charges and reimbursements were collected from billing systems.<br>Length of hospitalization and number of visit to health care                                | a) -Univariate analyses of QoL data: t-test + chi-square /Fisher's exact test.<br>Multiple regression for repeated QoL measures using baseline scores as a covariate.<br>-Costs: Univariate analysis + multivariate regression.<br>b) Yes (variables: demographics and disease characteristics).<br>Difference found: Intervention group women had lower             | Uncertainty: Intervention group had less uncertainty at 1, 3 and 6 months (p<0.05). Effect size not specified.<br>Mood and well-being: no sign. diff. between int. and control group.<br>Overall costs: no difference found including subgroup analyses. (Some subgroups benefitted significantly from APN, e.g. unmarried women and women with no family history of breast cancer).                                                                                                                                                                                |

| Ref  | a) Randomization type<br>b) N, n-intervention, and n-control                               | Outcomes                                                                                                                                                                                                      |                                                                                                                                                                                                                                                                                                                                                                                                                      | a) Statistical methods<br>b) Randomization evaluated? (yes, no)<br>If yes: variables, potential differences and possible adjustment performed noted?<br>c) Numbers included in analyses<br>d) Intention-to-treat analyses (yes/no/not mentioned)                                                                                                                                                                                                                                                                                                                                                                                                                                     | Main results                                                                                                                                                                                                                                                                                                                                                                                                                                                                            |
|------|--------------------------------------------------------------------------------------------|---------------------------------------------------------------------------------------------------------------------------------------------------------------------------------------------------------------|----------------------------------------------------------------------------------------------------------------------------------------------------------------------------------------------------------------------------------------------------------------------------------------------------------------------------------------------------------------------------------------------------------------------|--------------------------------------------------------------------------------------------------------------------------------------------------------------------------------------------------------------------------------------------------------------------------------------------------------------------------------------------------------------------------------------------------------------------------------------------------------------------------------------------------------------------------------------------------------------------------------------------------------------------------------------------------------------------------------------|-----------------------------------------------------------------------------------------------------------------------------------------------------------------------------------------------------------------------------------------------------------------------------------------------------------------------------------------------------------------------------------------------------------------------------------------------------------------------------------------|
|      |                                                                                            | Outcomes of interest* (Time of measure)                                                                                                                                                                       | Outcome source (Validity account#)                                                                                                                                                                                                                                                                                                                                                                                   |                                                                                                                                                                                                                                                                                                                                                                                                                                                                                                                                                                                                                                                                                      |                                                                                                                                                                                                                                                                                                                                                                                                                                                                                         |
|      |                                                                                            |                                                                                                                                                                                                               | provider were recorded.<br>Cost of APN services were based on time logs.                                                                                                                                                                                                                                                                                                                                             | histology (p=0,04) and more received adjuvant hormone therapy (p=0,03); adj. performed.<br>c) QoL: ?<br>Cost data: N=152 (n-int=78, n-contro=74; 58 excluded because of missing data)<br>d) Not mentioned                                                                                                                                                                                                                                                                                                                                                                                                                                                                            |                                                                                                                                                                                                                                                                                                                                                                                                                                                                                         |
| [25] | a) Three-arm simple randomization<br>b) N=166, Numbers assigned to each of the "arms" N/A. | -Measures of Patient Psychosocial Responses (Five interviews at 6-week interval; first before group assignment.)<br><br>-Number of hospitalizations<br>-Length of Stay (LOS) (continuously through 24 weeks). | -Psychosocial responses: Interview questionnaire (in-person or telephone ?); Scales: Symptom distress (The Symptom Distress Scale); Pain(McGill-Melzack Pain Questionnaire); Current Concerns (Weisman and Worden's Inventory of Current Concerns); Mood state (Profile of Mood States) Functional status (General Health Rating Index) (ref to all above)<br><br>-A Medical Record Review Instrument was developed. | a) Primary analyses: repeated measures and analysis of variance for each dependent variable (univariate mixed model and multivariate model). Plot of means for the core measures.<br>b) Yes. No difference on demographics, Starting points for depending variables were discrepant for which reason adjustment was performed (Potential bias of adj. was discussed).<br>c) Patient psychosocial responses: 78 patients completing four interviews (numbers in each group not stated).<br>Number of hospitalizations: 77 of 78 completing four interviews (n-OHC=24, n-SHC=27, n-OC=26).<br>LOS: 52 (had been hospitalized) of 78 completing four interviews (n-OHC=14, n-SHC=18, n- | Psychosocial Responses : Significant difference between the profiles of the two nursing groups and the office care group with regards to adjusted Symptom Distress (P=0.03) and adjusted Enforced Social Dependency (P=0.02) in favour of home care nursing.<br>The OC group rather steadily reported improved health perceptions over time, whereas the two treatment groups reported worse health perceptions (p<0.05).<br>No of hospitalizations and LOS: No significant differences |

| Ref  | a) Randomization type<br>b) N, n-intervention, and n-control            | Outcomes                                                                                                                                                                                                                                                                                                   |                                                                                                                                                                                                                                                                                                                                                                                                           | a) Statistical methods<br>b) Randomization evaluated? (yes, no)<br>If yes: variables, potential differences and possible adjustment performed noted?<br>c) Numbers included in analyses<br>d) Intention-to-treat analyses (yes/no/not mentioned)                                                                                                                                                                                                                                                                                                                                                                                                              | Main results                                                                                                                                                                                                                                                                                                                                                                                                                                                                                                                    |
|------|-------------------------------------------------------------------------|------------------------------------------------------------------------------------------------------------------------------------------------------------------------------------------------------------------------------------------------------------------------------------------------------------|-----------------------------------------------------------------------------------------------------------------------------------------------------------------------------------------------------------------------------------------------------------------------------------------------------------------------------------------------------------------------------------------------------------|---------------------------------------------------------------------------------------------------------------------------------------------------------------------------------------------------------------------------------------------------------------------------------------------------------------------------------------------------------------------------------------------------------------------------------------------------------------------------------------------------------------------------------------------------------------------------------------------------------------------------------------------------------------|---------------------------------------------------------------------------------------------------------------------------------------------------------------------------------------------------------------------------------------------------------------------------------------------------------------------------------------------------------------------------------------------------------------------------------------------------------------------------------------------------------------------------------|
|      |                                                                         | Outcomes of interest* (Time of measure)                                                                                                                                                                                                                                                                    | Outcome source (Validity account#)                                                                                                                                                                                                                                                                                                                                                                        |                                                                                                                                                                                                                                                                                                                                                                                                                                                                                                                                                                                                                                                               |                                                                                                                                                                                                                                                                                                                                                                                                                                                                                                                                 |
|      |                                                                         |                                                                                                                                                                                                                                                                                                            |                                                                                                                                                                                                                                                                                                                                                                                                           | OC=20).<br>d) Not mentioned                                                                                                                                                                                                                                                                                                                                                                                                                                                                                                                                                                                                                                   |                                                                                                                                                                                                                                                                                                                                                                                                                                                                                                                                 |
| [24] | a) Simple randomization.<br>b) N=375, n-intervention=190, n-control=185 | Primary: Length of survival (up to 44 months of follow up)<br>Secondary: To identify psychosocial and clinical predictors of patient survival (i.e. depressive symptoms, symptom distress, functional status, co-morbidities, length of hospital stay, age, and cancer stage). (baseline, 3, and 6 months) | Survival status was ascertained by letter, telephone, or death certificates (?)<br>Demographics: "obtained at accrual" (?)<br>Stage of disease: Surgical pathology reports and physician's discharge summary (?)<br><br>Psychosocial questionnaires : Center for Epidemiological Studies-Depression Scale (CES-D), Symptom Distress Scale (SDS), and Enforced Social Dependency Scale (ESDS) (ref to all) | a) Stratified log-rank test was used to compare groups. Kaplan-Meier curves stratified by stage of disease at diagnosis. Cox's proportional hazards regression model to compute adjusted hazard ratios (=HR; Proportional hazards assumption was Schoenfeld tested)<br>b) Yes (demographics and clinical variables; more late stage patients in intervention group (p=0,013). Adjusted and stratified analyses performed.<br>c) Survival status for all 375 included patients were obtained Psychosocial questionnaire responderse: time 0: n-int=190 n-UC=185; time 3 months: n-int=163, n-UC= 153; time 6 months: n-int=158, n-UC=147).<br>d) Not mentioned | Non-stratified analyses revealed no difference in survival status between groups (p=0,129).<br>Stratified analyses:<br>Late-stage patients' 2-year survival were 66.7% in int. group vs. 39.6% in control group (p<0.05).<br>Adjusted for psychosocial and clinical covariates:<br>Usual care had death-HR=2.04 (95% CI 1.33-3.12, p=0.001)<br>Late stage usual care patients had adjusted death-HR=4.55 (CI 2.92-7.08; p<0.001)<br><br>Outcomes of psychosocial questionnaires were not mentioned at all in results paragraph. |

| Ref  | a) Randomization type<br>b) N, n-intervention, and n-control                                                                                                        | Outcomes                                                                                                                                                                                                                                                                                                                                                                                                     |                                                                                                                                                                                                                                                                                                                                                                                                                                                                                                                                                                                                                                                                               | a) Statistical methods<br>b) Randomization evaluated? (yes, no)<br>If yes: variables, potential differences and possible adjustment performed noted?<br>c) Numbers included in analyses<br>d) Intention-to-treat analyses (yes/no/not mentioned)                                                                                                                                                                                                                                                                                                                                                                                                                                                                                                                                                                                                                                    | Main results                                                                                                                                                                                                                                                                                                                                                                                                                                                                                                                                                                                                                                                                                                                                                  |
|------|---------------------------------------------------------------------------------------------------------------------------------------------------------------------|--------------------------------------------------------------------------------------------------------------------------------------------------------------------------------------------------------------------------------------------------------------------------------------------------------------------------------------------------------------------------------------------------------------|-------------------------------------------------------------------------------------------------------------------------------------------------------------------------------------------------------------------------------------------------------------------------------------------------------------------------------------------------------------------------------------------------------------------------------------------------------------------------------------------------------------------------------------------------------------------------------------------------------------------------------------------------------------------------------|-------------------------------------------------------------------------------------------------------------------------------------------------------------------------------------------------------------------------------------------------------------------------------------------------------------------------------------------------------------------------------------------------------------------------------------------------------------------------------------------------------------------------------------------------------------------------------------------------------------------------------------------------------------------------------------------------------------------------------------------------------------------------------------------------------------------------------------------------------------------------------------|---------------------------------------------------------------------------------------------------------------------------------------------------------------------------------------------------------------------------------------------------------------------------------------------------------------------------------------------------------------------------------------------------------------------------------------------------------------------------------------------------------------------------------------------------------------------------------------------------------------------------------------------------------------------------------------------------------------------------------------------------------------|
|      |                                                                                                                                                                     | Outcomes of interest* (Time of measure)                                                                                                                                                                                                                                                                                                                                                                      | Outcome source (Validity account#)                                                                                                                                                                                                                                                                                                                                                                                                                                                                                                                                                                                                                                            |                                                                                                                                                                                                                                                                                                                                                                                                                                                                                                                                                                                                                                                                                                                                                                                                                                                                                     |                                                                                                                                                                                                                                                                                                                                                                                                                                                                                                                                                                                                                                                                                                                                                               |
| [26] | <p>a) Block-randomization (blocks of 10; rationale not outlined)</p> <p>b) N=275; n-AICCP=133, n-UC=142 ; N-surrogates (relatives)=168, n-sAICCP =76, n-sUC=92.</p> | <p>-Patients' evaluations of patient/provider communication, satisfaction with care and attitudes about participation in treatment planning (enrolment, at 3 and 6 months)</p> <p>-Surrogates' experiences with the health care system. (3 months post-enrolment.)</p> <p>-Costs (end of study)</p> <p>-Advance directives (AD) and do-not-resuscitate and intubate (DNR[I]) (enrolment, 3 and 6 months)</p> | <p>Patient/provider communication, satisfaction with care: Investigator-constructed, 10-item scale (? , but "reliability tested on enrolment")</p> <p>Participation in treatment planning was assessed by a single item (?; "asked" – questionnaire or interview?)</p> <p>Surrogates' experiences (problems in 7 domains were averaged to create a single overall rating): Modified EOL Family Interview (ref; "asked" – questionnaire or interview?)</p> <p>Costs: Program contact, salary, and overhead costs collected from 3 sites (the VAMC patients).<br/>Other costs: medical records for VAMCs patients.</p> <p>AD and DNR(I): VAMC participants' medical records</p> | <p>a) -Patients' evaluations: Scores were examined for effects of group, time, and group-by-time interaction using a random effects regression model.<br/>-Surrogates' exp.: Post-intervention scores t-test compared.<br/>-AD: Chi-square comparison and t-test. Kaplan-Meier curves comparison of group membership and time to completion of ADs.<br/>-Costs: F test<br/>Effect sizes were calculated for most outcomes.</p> <p>b) Yes, (Patients' demographics and diagnoses (and later survival), no diff.; surrogates: No of participants, sex and relationship: no diff.)</p> <p>c) Patients and surrogates evaluations: ?<br/>Mean per case AICCP costs: Data for 70 VAMC patients.<br/>Other costs:169 VAMC patients (AICCP=93, UC=76).<br/>AD etc: data on 180 VAMC patients (AICCP= 85 and UC=95)</p> <p>d) Yes, all outcomes (18 patients crossed over to AICCP, two</p> | <p>Patient satisfaction with care: Significant group-by-time interaction in favour of the AICCP group (Effect size 0.18, <math>P = 0.03</math>). (Effect size is the ratio of the estimated treatment effect.)</p> <p>Surrogates post-test scores: Fewer problems (with the spiritual and emotional support delivered) reported by AICCP surrogates than UC surrogates (effect size 0.39, <math>p=0.03</math>)</p> <p>Costs: no stat. sign diff.<br/>AD: Median time to completion of first AD: AICCP=46 days vs. UC= 238 days (log-rank <math>P=0.02</math>)</p> <p>Proportion of patients having completed at least one AD, and the mean numbers of ADs per patient were sign. higher for the AICCP group at both 3 and 6 months (<math>p=0.01</math>).</p> |

| Ref  | a) Randomization type<br>b) N, n-intervention, and n-control                                                                                            | Outcomes                                                                                                                                                                         |                                                                                                                                                                                                                                                                                                                                                                                                                             | a) Statistical methods<br>b) Randomization evaluated? (yes, no)<br>If yes: variables, potential differences and possible adjustment performed noted?<br>c) Numbers included in analyses<br>d) Intention-to-treat analyses (yes/no/not mentioned)                                                                                                                                                     | Main results                                                                                                                                              |
|------|---------------------------------------------------------------------------------------------------------------------------------------------------------|----------------------------------------------------------------------------------------------------------------------------------------------------------------------------------|-----------------------------------------------------------------------------------------------------------------------------------------------------------------------------------------------------------------------------------------------------------------------------------------------------------------------------------------------------------------------------------------------------------------------------|------------------------------------------------------------------------------------------------------------------------------------------------------------------------------------------------------------------------------------------------------------------------------------------------------------------------------------------------------------------------------------------------------|-----------------------------------------------------------------------------------------------------------------------------------------------------------|
|      |                                                                                                                                                         | Outcomes of interest* (Time of measure)                                                                                                                                          | Outcome source (Validity account#)                                                                                                                                                                                                                                                                                                                                                                                          |                                                                                                                                                                                                                                                                                                                                                                                                      |                                                                                                                                                           |
|      |                                                                                                                                                         |                                                                                                                                                                                  |                                                                                                                                                                                                                                                                                                                                                                                                                             | patients crossed over to UC. Some VAMCs inpatient units implemented AICCP as usual care during the study)                                                                                                                                                                                                                                                                                            |                                                                                                                                                           |
| [22] | a) Stratified randomisation (six strata; three strata based on unmet need status, and two strata based on gender).<br>b) N=259, n-CM=130, n-control=129 | -Unmet needs (assessed by patients)<br>-Reported symptom severity<br>-Several dimensions of QoL<br>-Formal service utilization (Data collection: At baseline, at 3 and 6 months) | -Aspects of daily living (three unmet needs-categories) (ref);<br>-Standard questions on symptom severity (?)<br>-Spitzer's physical "QoL Index"(ref), five-item mood state score from SF-36 (ref), and a specially developed 4-item scale measuring patient experienced disruptions in treatment (?)<br>All above: Telephone interviews<br>-Service utilization: Patients' reports and audit of patients' medical records. | a) Chi-square and analysis of variance to test differences between intervention and control groups<br>b) yes (no difference found on baseline demographic, medical and need status)<br>d) 3 months: n-CM=109, n-control=108, 6 months: n-CM=93, n-control=92<br>e) Not mentioned; unclear if 11 CM group patients who refused CM services were followed up and in which group they were analysed (?) | No statistically significant differences were observed on any outcome measure for the overall sample as well as for selected "at-risk" patient subgroups. |

| Ref  | a) Randomization type<br>b) N, n-intervention, and n-control                                                                                                                 | Outcomes                                                                                                                                                                                                                                                                                                                |                                                                                                                                                                                                                           | a) Statistical methods<br>b) Randomization evaluated? (yes, no)<br>If yes: variables, potential differences and possible adjustment performed noted?<br>c) Numbers included in analyses<br>d) Intention-to-treat analyses (yes/no/not mentioned)                                                                                                                                                              | Main results                                                                                                                                                                                                                                                                                                                                                                                          |
|------|------------------------------------------------------------------------------------------------------------------------------------------------------------------------------|-------------------------------------------------------------------------------------------------------------------------------------------------------------------------------------------------------------------------------------------------------------------------------------------------------------------------|---------------------------------------------------------------------------------------------------------------------------------------------------------------------------------------------------------------------------|---------------------------------------------------------------------------------------------------------------------------------------------------------------------------------------------------------------------------------------------------------------------------------------------------------------------------------------------------------------------------------------------------------------|-------------------------------------------------------------------------------------------------------------------------------------------------------------------------------------------------------------------------------------------------------------------------------------------------------------------------------------------------------------------------------------------------------|
|      |                                                                                                                                                                              | Outcomes of interest* (Time of measure)                                                                                                                                                                                                                                                                                 | Outcome source (Validity account#)                                                                                                                                                                                        |                                                                                                                                                                                                                                                                                                                                                                                                               |                                                                                                                                                                                                                                                                                                                                                                                                       |
| [27] | a) Stratified randomisation according to hospital and treatment intent (rationale and numbers of strata not outlined)<br>b) N=203 (n-nurse led follow-up=100, n-control=103) | Primary: QoL and patients' satisfaction at three months (assessed at baseline, 3, 6, and 12 months)<br><br>Secondary:<br>Overall survival,<br>Symptom-free survival,<br>Progression-free survival.<br>GPs' satisfaction (at the end of study participation).<br>Service use (3, 6 and 12 months) and cost effectiveness | -EORTC QLQ-C30 and module about lung cancer. (ref)<br>-Patient satisfaction questionnaire incorporating three validated measures and tested in a pilot study (ref)<br><br>No information on source of secondary outcomes. | a) QoL + satisfaction: Mann-Whitney U test<br>Survival: Kaplan-Meier<br>Costs: Mann-Whitney U test.<br>b) Yes (no difference found on clinical, OoL and pat sat baseline variables)<br>c) 3 months: n-int=76, n-control=74; 6 months: n-int=53, n-control= 58; 12 months: n-int=26, n-control=29<br>d) Not mentioned, but it was mentioned that no intervention group patients reverted to medical follow-up. | Int. group had less dyspnoea (p=0,03; a QoL score) and significantly higher satisfaction in each subscale at three months.<br><br>Int. group had longer time to symptomatic progression (p=0,01). Significant change in pattern of service use, but no difference in readmission rates. Significantly more patients in int. group died at home (p=0,04). No difference in costs, and GP satisfaction. |

? Not to be found in the article

\* Outcomes of interest: if primary and secondary was not indicated, "--" are used in front of each

#Validity account categorised as follows: ?: validity not mentioned at all; ref: reference(s) quoted; yes: it is mentioned that measure is validated
